# Supplementary material for: Influence of Zr Addition on the Microstructure and Hydrogenation Kinetics of Ti50−xV25Cr25Zrx (x = 0, 5, 7, and 9) Alloys
Source: MDPI journal article supplement (doi:10.3390/ma17061366), 2024-03-16
Supplement: s1 [file s1]

Type of the Paper (Article, Review, Communication, etc.)

# Influence of Zr addition on the microstructure and hydrogenation kinetics of $\text{Ti}_{50-x}\text{V}_{25}\text{Cr}_{25}\text{Zr}_x$ ( $x=0, 5, 7$ , and $9$ ) alloys

Qianying Zeng <sup>1</sup>, Feng Wang <sup>1,\*</sup>, Zhengxi Li<sup>1</sup>, Maohua Rong<sup>1,\*</sup>, Jiang Wang<sup>1</sup>, and Zhongmin Wang<sup>2</sup>

<sup>1</sup> School of Materials Science and Engineering, Guilin University of Electronic Technology, Guilin 541000, China;

<sup>2</sup> Guangxi Academy of Sciences, Nanning 530007, China;

\* Correspondence: wf@guet.edu.cn or rongmh124@guet.edu.cn

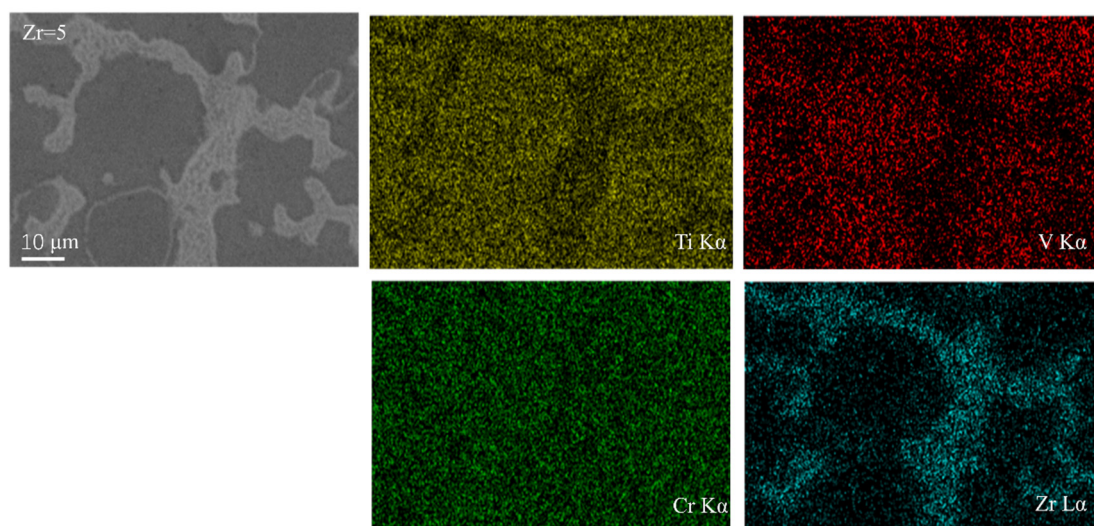

**Figure S1.** Element mapping of as-cast  $\text{Ti}_{45}\text{V}_{25}\text{Cr}_{25}\text{Zr}_5$  alloy.
